# Supplementary material for: Detection of Human Adenovirus and Rotavirus in Untreated Wastewater in Lusaka, Zambia: Opportunity for Establishment of Wastewater Surveillance System for the Community
Source: Preprints.org preprint supplement (doi:10.20944/preprints202403.1093.v1), 2024-03-19
Supplement: Supplementary file 3 [file supplementary]

| **Site** | **Week** | **Methods** | **Adeno qRTPCR** | **Rota**  **qRTPCR** | **Site Results HAdV** | **Site Results**  **RVA** |
| --- | --- | --- | --- | --- | --- | --- |
| **Chelstone** | - 1 | - PEG | - | - | **Negative** | **Negative** |
| - 1 | - BMFs | - | - |  |  |
| - 1 | - SM | - | - |  |  |
| **Mass Media** | - 1 | - PEG | + | - | **Positive** | **Positive** |
| - 1 | - BMFs | - | - |  |  |
| - 1 | - SM | + | + |  |  |
| **Kaunda Square** | - 1 | - PEG | + | + | **Positive** | **Positive** |
| - 1 | - BMFs | + | - |  |  |
| - 1 | - SM | + | + |  |  |
| **Manchichi** | - 1 | - PEG | + | + | **Positive** | **Positive** |
| - 1 | - BMFs | - | + |  |  |
| - 1 | - SM | + | + |  |  |
| **Chelstone** | - 2 | - PEG | - | - | **Negative** | **Negative** |
| - 2 | - BMFs | - | - |  |  |
| - 2 | - SM | - | - |  |  |
| **Mass Media** | - 2 | - PEG | - | - | **Positive** | **Negative** |
| - 2 | - BMFs | + | - |  |  |
| - 2 | - SM | - | - |  |  |
| **Kaunda Square** | - 2 | - PEG | + | - | **Positive** | **Positive** |
| - 2 | - BMFs | + | + |  |  |
| - 2 | - SM | + | + |  |  |
| **Manchichi** | - 2 | - PEG | + | - | **Positive** | **Negative** |
| - 2 | - BMFs | + | - |  |  |
| - 2 | - SM | + | - |  |  |

**Table S7.** Sites showing the results and the methods used for detection for detection of HadV, and RVA.

|  | **Week** | **Methods** | **Adeno qRTPCR** | **Rota**  **qRTPCR** | **Site Results HAdV** | **Site Results**  **RVA** |
| --- | --- | --- | --- | --- | --- | --- |
| **Chelstone** | - 3 | - PEG | - | - | **Positive** | **Positive** |
| - 3 | - BMFs | + | + |  |  |
| - 3 | - SM | - | - |  |  |
| **Mass Media** | - 3 | - PEG | + | - | **Positive** | **Positive** |
| - 3 | - BMFs | - | - |  |  |
| - 3 | - SM | - | + |  |  |
| **Kaunda Square** | - 3 | - PEG | + | - | **Positive** | **Positive** |
| - 3 | - BMFs | + | - |  |  |
| - 3 | - SM | + | + |  |  |
| **Manchichi** | - 3 | - PEG | + | - | **Positive** | **Positive** |
| - 3 | - BMFs | + | + |  |  |
| - 3 | - SM | + | + |  |  |
| **Chelstone** | - 4 | - PEG | + | + | **Positive** | **Positive** |
| - 4 | - BMFs | - | - |  |  |
| - 4 | - SM | + | + |  |  |
| **Mass Media** | - 4 | - PEG | - | - | **Positive** | **Positive** |
| - 4 | - BMFs | + | + |  |  |
| - 4 | - SM | - | - |  |  |
| **Kaunda Square** | - 4 | - PEG | + | + | **Positive** | **Positive** |
| - 4 | - BMFs | + | + |  |  |
| - 4 | - SM | + | + |  |  |
| **Manchichi** | - 4 | - PEG | + | - | **Positive** | **Negative** |
| - 4 | - BMFs | + | - |  |  |
| - 4 | - SM | + | - |  |  |

|  | **Week** | **Methods** | **Adeno qRTPCR** | **Rota**  **qRTPCR** | **Site Results HAdV** | **Site Results**  **RVA** |
| --- | --- | --- | --- | --- | --- | --- |
| **Chelstone** | - 5 | - PEG | + | + | **Positive** | **Positive** |
| - 5 | - BMFs | + | - |  |  |
| - 5 | - SM | + | + |  |  |
| **Mass Media** | - 5 | - PEG | - | - | **Positive** | **Positive** |
| - 5 | - BMFs | + | + |  |  |
| - 5 | - SM | + | - |  |  |
| **Kaunda Square** | - 5 | - PEG | + | - | **Positive** | **Negative** |
| - 5 | - BMFs | + | - |  |  |
| - 5 | - SM | + | - |  |  |
| **Manchichi** | - 5 | - PEG | + | + | **Positive** | **Positive** |
| - 5 | - BMFs | + | - |  |  |
| - 5 | - SM | + | + |  |  |
